# Supplementary material
Source: PubMed Central journal article supplement (PMC4326027)
Supplement: Supp_Fig4.pdf [file Supp_Fig4.pdf]

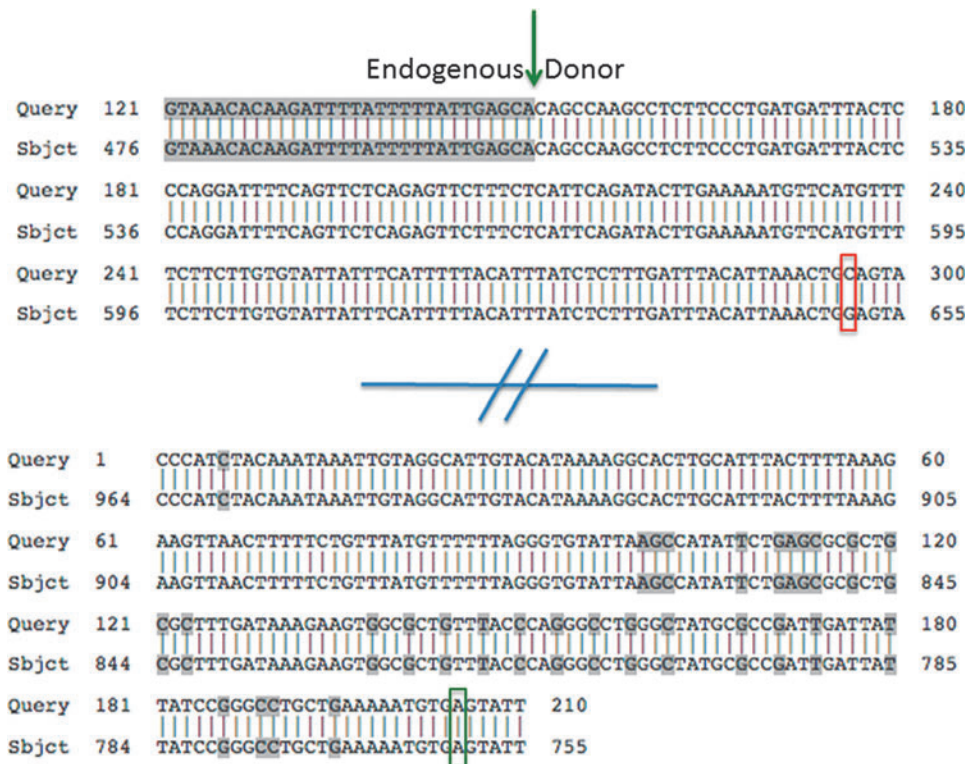

**SUPPLEMENTARY FIG. S4.** Primary sequence data of HDR PCR assay. A contiguous PCR amplicon derived from a locus-specific donor primer set was sequenced and shows a seamless junction between the endogenous gene and the donor arm (marked with *green arrow*). A distal silent polymorphism in the donor arm (*red box*) was not incorporated, indicating crossing over from donor sequences proximal to the break site. Shaded bases are donor-derived silent polymorphisms. *Green box* indicates corrected base at the c.456 + 4A > T locus. “Query” is the sequence derived from a CRISPR-corrected clone. “Sbjct” is the reference donor sequence. *Blue hatched lines* indicate the intervening donor/PCR sequences that were deleted for clarity.
